# 1 One-step multiple site-specific base editing by direct embryo injection for 2 precision and pyramid pig breeding

3 Ruigao Song<sup>1,2</sup>, Yu Wang<sup>1,2</sup>, Qiantao Zheng<sup>1</sup>, Jing Yao<sup>1</sup>, Chunwei Cao<sup>1</sup>, Yanfang Wang<sup>3,\*</sup>, Jianguo  
4 Zhao<sup>1,2,\*</sup>

5 <sup>1</sup> State Key Laboratory of Stem cell and Reproductive Biology, Institute of Zoology, Chinese Academy  
6 of Sciences, Beijing 100101, China

7 <sup>2</sup> University of Chinese Academy of Sciences, Beijing 100049, China

8 <sup>3</sup> State Key Laboratory of Animal Nutrition, Institute of Animal Science, Chinese Academy of  
9 Agricultural Sciences, Beijing, 100081, China

10 Correspondence: Jianguo Zhao ([zhaojg@ioz.ac.cn](mailto:zhaojg@ioz.ac.cn)) Tel: +86-010-64806259

11 These authors contributed equally: Ruigao Song, Yu Wang, Qiantao Zheng and Jing Yao

## 12 **Abstract**

13 Precise and simultaneous acquisition of multiple beneficial alleles in the genome to  
14 improve pig performance are pivotal for making elite breeders. Cytidine base editors  
15 (CBEs) have emerged as powerful tools for site-specific single nucleotide replacement.  
16 Here, we compare the editing efficiency of four CBEs in porcine embryonic cells and  
17 embryos to show that hA3A-BE3-Y130F and hA3A-eBE3-Y130F consistently results  
18 in higher base-editing efficiency and lower toxic effects to *in vitro* embryo development.  
19 We also show that zygote microinjection of hA3A-BE3-Y130F results in one-step  
20 generation of pigs (3BE pigs) harboring C-to-T point mutations, including a stop codon  
21 in *CD163* and in *MSTN* and induce beneficial allele in *IGF2*. The 3BE pigs showed  
22 improved growth performance, hip circumference, food conversion rate. Our results  
23 demonstrate that CBEs can mediate high throughput genome editing by direct embryo  
24 microinjection. Our approach allows immediate introduction of novel alleles for  
25 beneficial traits in transgene-free animals for pyramid breeding.

## 26 **Introduction**

27 Innovative approaches to accelerate improvement of livestock is urgently needed to  
28 meet the increased demands for animal protein. Significant obstacles in livestock  
29 breeding are limited dispersion of beneficial traits between different species and time  
30 constrains required for crossbreeding and selection of livestock with improved  
31 performance. Genome editing techniques, such as the clustered regularly interspaced  
32 short palindromic repeat (CRISPR) system, have provided revolutionary progress for  
33 improvement of pig performance at reduced cost and shortened time (*Huang et al.*,  
34 *2014*; *Whitworth et al.*, *2014*; *Whitworth et al.*, *2016*; *Yang et al.*, *2011*; *Zhang et al.*,  
35 *2019*). CRISPR/Cas9 mediated knockout of the *MSTN* gene in pigs led to improved  
36 muscle development and decreased fat accumulation (*Wang et al.*, *2017*). Editing the  
37 regulatory element within intron 3 of the *IGF2* gene abolished repressor ZBED6  
38 binding and resulted in improved meat production (*Xiang et al.*, *2018*). Most strikingly,  
39 studies of *CD163*-knockout pigs from the Prather group provided proof-of-concept that  
40 a single gene deletion establishes porcine reproductive and respiratory syndrome virus

41 (PRRSV)-resistant pigs, which has been further confirmed by several researchers  
42 (*Burkard et al., 2018; Tanihara et al., 2019; Whitworth et al., 2016*). Most recently,  
43 base editors (BEs) that fuse a cytidine or adenosine deaminase with a catalytically  
44 impaired CRISPR–Cas9 mutant have been shown could directly and efficiently  
45 generate precise point mutations in genomic DNA, without generating double-strand  
46 breaks (DSBs) or requiring a donor template (*Gehrke et al., 2018*). These novel tools  
47 have been used to induce single nucleotide modifications in a variety of animals (*Kim*  
48 *et al., 2017; Liu et al., 2018; Xie et al., 2019*). Specifically, CBEs have been used to  
49 induce C-to-T conversions of multiple genes in cell clones and then used as donors in  
50 SCNT to make immune-deficient pigs (*Xie et al., 2019*). Thus, BEs provide a strategy  
51 for precise and efficient editing of single nucleotide polymorphisms (SNPs) to improve  
52 livestock traits in pigs.

53 As we know, SNPs are the richest and most abundant form of genomic polymorphisms  
54 that constitute the genetic architecture of economic traits (*Contreras-Soto et al., 2017;*  
55 *Mora et al., 2016; Yue et al., 2019*). Almost 66% of the total phenotypic variation of  
56 pigs can be explained by SNPs (*Lee et al., 2012*). Functional SNPs related to various  
57 economic traits such as meat quality and growth (*Lee et al., 2012*), fecundity (*Ma et al.,*  
58 *2018*) and virus resistance (*Hess et al., 2016*) have been identified. However, generation  
59 of gene-edited pigs harboring beneficial SNPs is very inefficient, has a low throughput  
60 and heavily relies on SCNT, a very complicated technology. The technical challenges  
61 of genetic engineering in somatic cells and SCNT greatly hinders widespread  
62 application of genome editing in livestock for breeding.

63 In the present study, we screened CBE variants and found hA3A-BE3-Y130F and  
64 hA3A-eBE3-Y130F consistently result in higher base-editing efficiency in PEFs and  
65 embryos. Pigs harboring C-to-T point mutations that create a stop codon in *CD163* and  
66 in *MSTN* and introduce a beneficial allele in intron 3–3072 of the *IGF2* gene were  
67 generated in one step with direct zygote microinjection of hA3A-BE3-Y130F. The  
68 genetically engineered pigs showed disrupted gene expression of *CD163* and *MSTN*  
69 and enhanced expression of *IGF2*, which resulted in improved growth performance.  
70 We found that CBEs mediated precise and efficient genome editing at multiple sites  
71 with direct embryo injection, circumventing the need for SCNT and providing a  
72 potential process for prospective pyramid breeding in pigs.

## 73 **Results**

### 74 **CBEs-mediated base editing at multiple loci in PEFs**

75 In order to screen suitable tools for base editing, the editing efficiency of four CBEs –  
76 rA1-BE3, hA3A-BE3, hA3A-BE3-Y130F and hA3A-eBE-Y130F – were compared in  
77 PEFs. Considering the potential for pyramid breeding, target loci from *CD163*, *MSTN*  
78 and *IGF2* genes were selected. Premature stop codons (R4312STOP and Q218STOP)  
79 were generated by a single C-to-T conversion at the target sites in *CD163* and *MSTN*,  
80 which are expected to confer double-muscling and porcine reproductive and respiratory  
81 syndrome virus (PRRSV) resistance traits in pigs, respectively (Fig. 1A). For *IGF2*, a

82 point conversion at the target sites of Bama pig would abrogate BED-type containing 6  
 83 (ZBED6) binding, resulting in enhanced *IGF2* expression in skeletal muscle and  
 84 improved lean meat yield (*Van Laere et al., 2003*) (Fig. 1A).

85 Three sgRNA candidates targeting exons of porcine *CD163*, *MSTN* and *IGF2* genes  
 86 were synthesized and transfected into PEFs with vectors expressing rA1-BE3, hA3A-  
 87 BE3, hA3A-BE3-Y130F and hA3A-eBE-Y130F. After 48 h of culturing, cells were  
 88 collected and target sequences were PCR amplified for sequencing. The editing  
 89 efficiencies of hA3A-BE3, hA3A-BE3-Y130F and hA3A-eBE-Y130F were  
 90 significantly higher than that of rA1-BE3 (Fig. 1B, C). We also observed the editing  
 91 efficiencies varied among the three genes, with the *IGF2* target site showing lowest  
 92 editing efficiency.

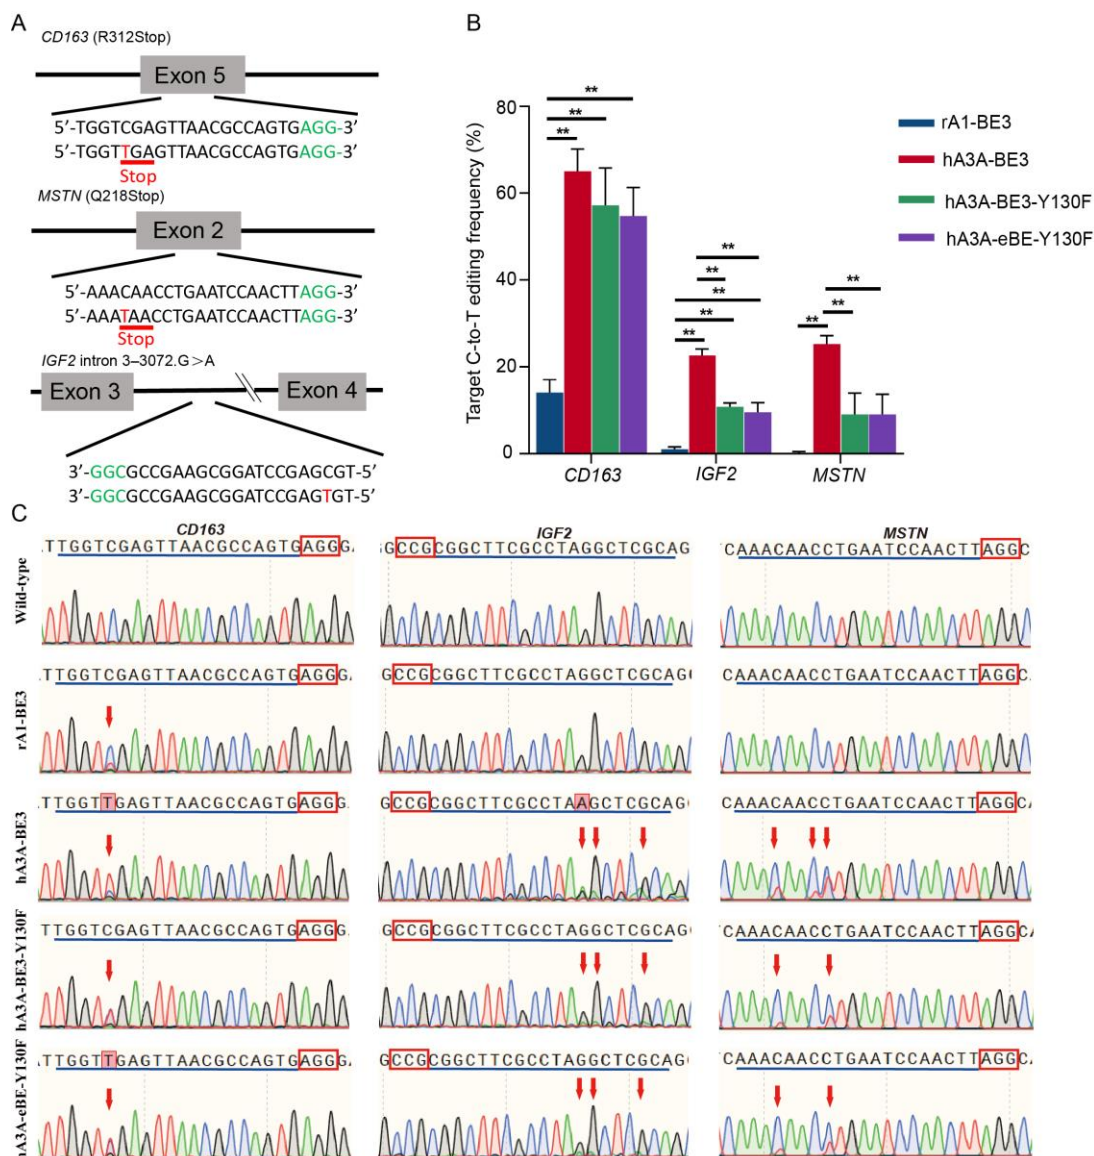

93  
 94 **Figure 1** Base editing at multiple loci in PEF cells by different base editors. **A** Schematic of the *CD163*, *MSTN*  
 95 and *IGF2* gene structure. One sgRNA targeting each gene was designed. The codon to be modified is underlined.  
 96 The targeting site is in red and the PAM region is in green. **B** The C-to-T editing frequency of different base

97 editors in multiple target sites were detected by sequencing. C Representative sequence chromatogram of different  
98 base editors in the target site of *CDI63*, *MSTN* and *IGF2*. Red box shows the C-to-T substitutions at target sites.  
99 We next explored whether hA3A-BE3 could generate simultaneous C-to-T conversions  
100 in multiple genes in PEFs. The mixed sgRNAs were co-transfected with hA3A-BE3-  
101 expression vectors into PEFs, which were then cultured for 48 h before single-cell  
102 sorting by FACS. Next, thirty-nine single-cell colonies were selected and genotyped by  
103 Sanger sequencing after 8-14 days of cell culture. Among the 39 colonies, 28.21%  
104 (11/39) colonies showed C-to-T substitution among all three genes (Fig. 2A). In  
105 addition, 20 colonies (two for *CDI63* and *IGF2*, sixteen for *CDI63* and *MSTN*, and two  
106 for *IGF2* and *MSTN*) showed double-gene base editing, and 4 colonies (three for *CDI63*,  
107 one for *MSTN*) showed single-gene base editing (Fig. 2A). Overall, 20.51% (8/39)  
108 colonies contained the targeted C-to-T homozygous mutation at all three gene sites (Fig.  
109 2B). For each single gene, 76.92% (30/39), 28.21% (11/39) and 64.10% (25/39) of the  
110 colonies were homozygous mutants in *CDI63*, *IGF2* and *MSTN*, respectively. Indel  
111 incorporation was also found in *CDI63* (10.25%), *IGF2* (51.28%) and *MSTN* (15.38%)  
112 (Fig. 2C). In addition, an unwanted C-to-A substitution at the targeted position in  
113 *CDI63* was detected in one colony (Fig. 2C). Thus, results show that hA3A-BE3 can  
114 efficiently induce biallelic C-to-T substitutions in three genes during one transfection  
115 of PEFs. Sanger sequence results further confirmed the high frequency of targeted C-  
116 to-T conversions (Fig. 2D).

A

| No. of screened colonies | No. of colonies with single gene base editing (%) |             |             | No. of colonies with two genes base editing (%) |                              |                             | No. of colonies with three genes base editing (%) |
|--------------------------|---------------------------------------------------|-------------|-------------|-------------------------------------------------|------------------------------|-----------------------------|---------------------------------------------------|
|                          | <i>CD163</i>                                      | <i>IGF2</i> | <i>MSTN</i> | <i>CD163</i> and <i>IGF2</i>                    | <i>CD163</i> and <i>MSTN</i> | <i>IGF2</i> and <i>MSTN</i> |                                                   |
| 39                       | 3 (7.69)                                          | 0           | 1 (2.56)    | 2 (5.13)                                        | 16 (41.03)                   | 2 (5.13)                    | 11 (28.21)                                        |

B

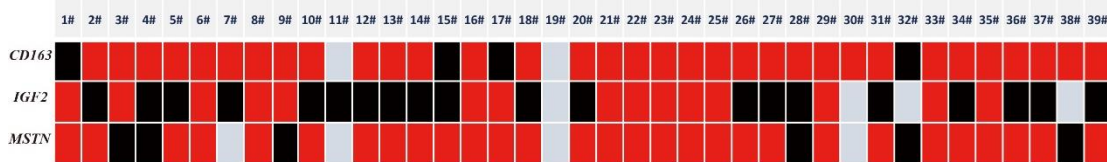

C

| Gene         | No. of screened colonies | No. of mutants (%) | Targeted point mutants(C-to-T)  |                               | No. of indels (%) | No. of non - C-to-T (%) |
|--------------|--------------------------|--------------------|---------------------------------|-------------------------------|-------------------|-------------------------|
|              |                          |                    | No. of heterozygous mutants (%) | No. of homozygous mutants (%) |                   |                         |
| <i>CD163</i> | 39                       | 37 (94.87)         | 2 (5.13)                        | 30 (76.92)                    | 4 (10.25)         | 1 (2.56)                |
| <i>IGF2</i>  | 39                       | 33 (84.62)         | 4 (10.26)                       | 11 (28.21)                    | 20 (51.28)        | 0                       |
| <i>MSTN</i>  | 39                       | 35 (89.74)         | 4 (10.26)                       | 25 (64.10)                    | 6 (15.38)         | 0                       |

D

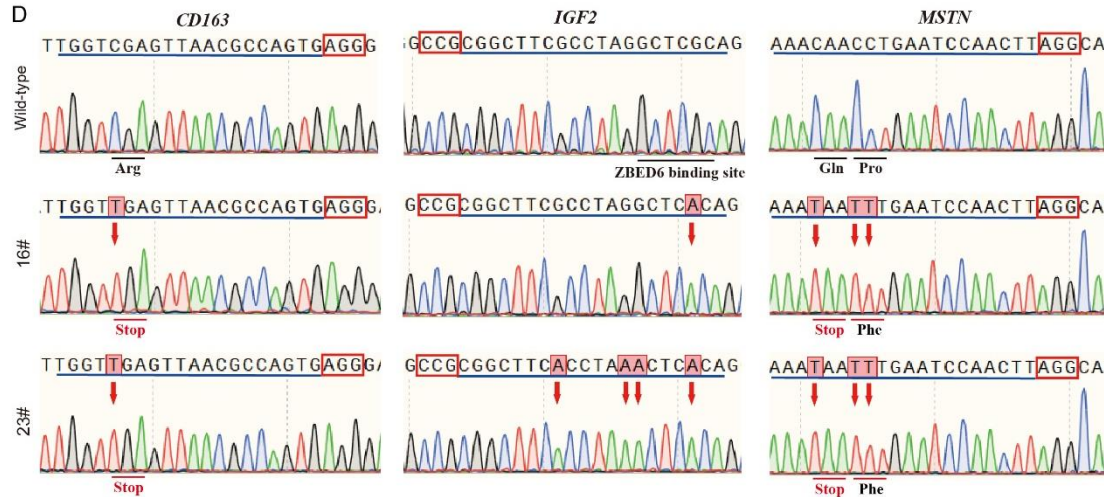

117

118

119

120

121

122

123

124

125

126

127

128

129

130

**Figure 2 ha3A-BE3-mediated base editing for multiple genes in PEF cells.** **A** Summary of base editing in PEF cells. **B** The base editing results of the *CD163*, *MSTN* and *IGF2* genes in the colonies. The red represents the base conversion of C-to-T, and the black represents an indels. **C** Summary of product types of base editing by ha3A-BE3 in porcine somatic cells. **D** Sanger sequencing chromatograms of the selected single-cell colonies. The red arrow indicate expected substitutions at target sites.

### Efficient one-step base editing for multiple genes in porcine embryos via embryo injection

We next detected the editing efficiency of these four CBEs in porcine embryos. In vitro transcribed sgRNAs (*CD163*-sgRNA and *MSTN*-sgRNA) and BE3, ha3A-BE3, ha3A-BE3-Y130F and ha3A-eBE-Y130F mRNAs were co-injected into porcine parthenogenetically activated (PA) oocytes. The injected PA embryos were cultured for 7 days to determine developmental competency. The blastocyst rate of embryos injected with *CD163*-sgRNA and mRNA of rA1-BE3, ha3A-BE3, ha3A-BE3-Y130F,

131 and hA3A-eBE-Y130F were 15.8% (27/171), 0.96% (4/415), 15.63% (25/160) and  
132 17.27% (24/139) (Fig. 3A), respectively. The blastocyst rate of embryos injected with  
133 *MSTN*-sgRNA and mRNA of rA1-BE3, hA3A-BE3, hA3A-BE3-Y130F, and hA3A-  
134 eBE-Y130F were 7.36% (12/163), 1.54% (9/585), 8.63% (22/255) and 8.52% (15/176)  
135 (Fig. 3B), respectively. The rates of embryos injected with CBEs are significantly lower  
136 than the rates of the control embryos injected with water, indicating that CBEs might  
137 affect early embryonic development competency. Notably, the hA3A-BE3 injection  
138 might lead to detrimental effects in embryo development, which may result from the  
139 high off-target rate of hA3A-BE3 in mRNA (Zhou *et al.*, 2019).

140 Single blastocysts were lysed individually for genotyping by Sanger sequencing. Of the  
141 screened blastocysts, 85.2% (23/27) for rA1-BE3, 100% for hA3A-BE3 (4/4), 100%  
142 (24/24) for hA3A-BE3-Y130F and 100% (23/23) for hA3A-eBE-Y130F were  
143 identified to have targeted mutations in *CDI63* (Fig. 3A). In one hA3A-BE3 injected  
144 blastocyst, C-to-T conversions also occurred outside the editing window. In addition to  
145 the specific C-to-T mutation, a few C-to-A substitutions were also found in rA1-BE3  
146 (7.4%) and hA3A-BE3-Y130F (12.5%) injected blastocyst, as well as an indel in a rA1-  
147 BE3-injected blastocyst (Fig. 3A).

148 The targeted mutation rate in the *MSTN* injected group was 33.3% (3/9) for rA1-BE3,  
149 66.7% (4/6) for hA3A-BE3, 55.6% (10/18) for hA3A-BE3-Y130F and 78.6% (11/14)  
150 for hA3A-eBE-Y130F (Fig. 3B). We also detected indels in 1 (11.1%, 1/9) blastocyst  
151 in the rA1-BE3 group, 3 (16.7%, 3/18) blastocysts in the hA3A-BE3-Y130F group and  
152 2 (14.3%, 2/14) blastocysts in the hA3A-eBE-Y130F group (Fig. 3B). These data  
153 indicate rA1-BE3, hA3A-BE3-Y130F and hA3A-eBE-Y130F might induce DSB in the  
154 genome, resulting in indels (Fig. 3B). At the *MSTN* target site, we also have detected  
155 non-C-to-T conversion in 1 (5.6%, 1/18) blastocyst of the hA3A-BE3-Y130F group  
156 and 1 (8.3%, 1/12) blastocyst of the hA3A-eBE-Y130F group (Fig. 3B).

157 The targeted C-to-T mutation frequency in each blastocyst of different base editors is  
158 shown in Fig 3C and Fig 3D. At both the *CDI63* and *MSTN* targeting sites, the editing  
159 efficiencies of hA3A-BE3-Y130F and hA3A-eBE-Y130F were significantly higher  
160 than that of rA1-BE3. In addition, the efficiency of hA3A-BE3 was significantly higher  
161 than that of rA1-BE3 at the *MSTN* gene site.

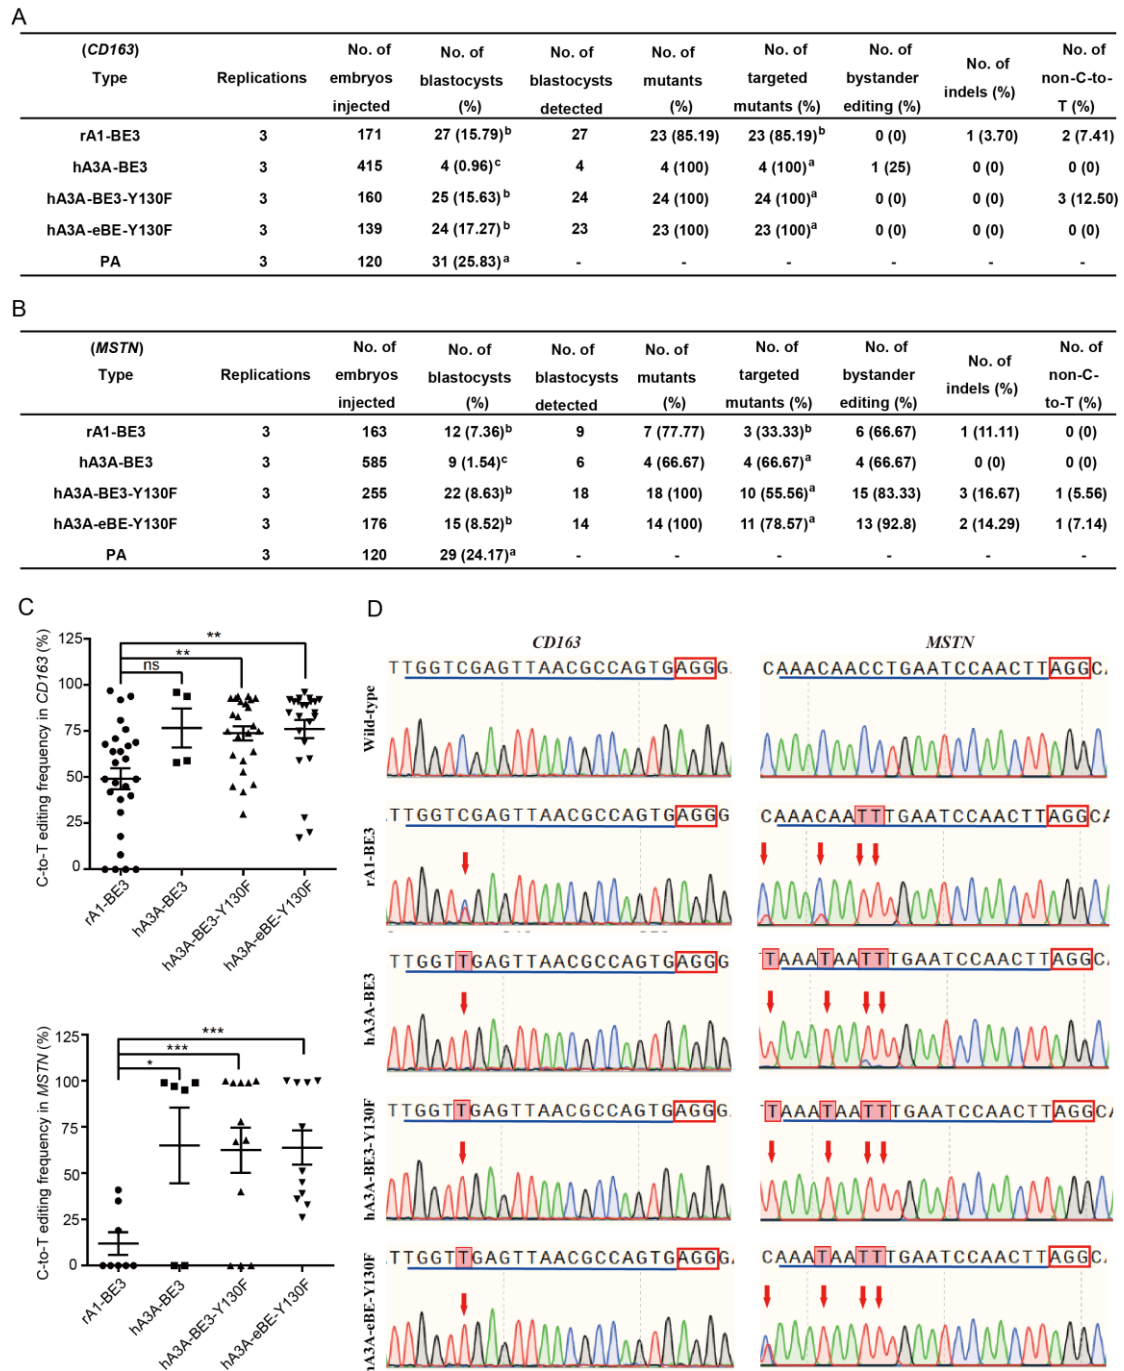

162

163 **Figure 3 Efficient base editing for multiple sites in porcine embryos.** Summary of base editing in *CD163* (A)

164 and *MSTN* (B) by base editors in porcine embryos. C Summary of C-to-T editing frequency of base editors in

165 *CD163*-C5 site and *MSTN*-C4 site in porcine embryos. D Sanger sequencing chromatograms of the different base

166 editors in the *CD163* and *MSNT* genes in porcine embryos. The red arrow indicate substitutions at target sites.

167 Superscript alphabets (a,b and c) represents values are significantly different ( $P < 0.05$ ).

168 **Generation of *MSTN*, *CD163* and *IGF2* gene mutations in pigs via one-step zygote**

169 **injection**

170 Although hA3A-BE3 mediated the highest editing efficiency in both cell transfection and embryonic

171 and embryo injection, it also caused the greatest detrimental effect on embryonic

172 development after injection. Hence, hA3A-BE3-Y130F was selected for pig zygote  
173 injection to base edit multiple genes in one step. The mixed sgRNAs and hA3A-BE3-  
174 Y130F mRNA was co-injected into the cytoplasm of one-cell stage zygotes obtained  
175 from nine Bama pigs. Thirty-eight injected zygotes were then transferred into three  
176 surrogate pigs (Fig. 4A). One surrogate pregnancy developed to term, resulting in a  
177 litter of five pigs with four healthy offspring (Fig. 4A, 4B). Genotyping showed that all  
178 five pigs harbored mutations in the three genes. At the target site of *CDI63*, ~100% of  
179 the site-specific C-to-T mutations was achieved at the *CDI63* c.2142C site for all pigs,  
180 resulting in a stop codon with a 312 arginine conversion (Fig. 4C, D). The target deep  
181 sequence results showed that the intron 3-3072.G>A in the *IGF2* gene were detected in  
182 pigs with an efficiency of 46% (1920901), 98% (1920902) and 45% (1920905) (Fig.  
183 4C, D). In addition, an unwanted mutation (intron 3-3067.G>A and intron 3-3068.G>A)  
184 were detected in pigs with an efficiency of 46% (1920901), 98% (1920902, 1920904)  
185 and 45% (1920905) (Fig. 4C, D). Moreover, three pigs (1920901, 1920904 and  
186 1920905) harbored undesired indels at the *IGF2* target site (Fig. 4C, D). All five pigs  
187 harbored the target Q218Stop mutation in the *MSTN* gene, but two of the five pigs were  
188 heterozygous with a frequency of 50% and 41% (Fig. 4C, D). Unwanted L216L and  
189 P219F mutations were also detected in all pigs with high efficiency (Fig. 4C, D).  
190 Complete genotyping results are shown in Supplementary Fig. 1A and Fig. 1B. Notably,  
191 the 1920902 piglet harbored a biallelic C-to-T transition in three genes. Sequencing  
192 results indicate that all 3BE pigs were homozygous at *CDI63* sites, one piglet (1920904)  
193 was homozygous at *MSTN* sites, and two pigs (1920902 and 1920903) were  
194 homozygous at *IGF2* sites (Fig 4D). In addition, we detected that 1920901, 1920902  
195 and 1920905 were chimeric at *MSTN* sites. Sanger sequencing analyses of ten POTs  
196 showed that no off-target mutations were found in four of the base-edited pigs  
197 (Supplementary Fig. 2).

198 For mRNA expression analysis, q-PCR showed that the mRNA expression of *IGF2* in  
199 the heart, liver, lung, kidney, back muscle and gluteus muscle tissues of the piglet  
200 (1920901) was significantly higher than expression in wild-type (WT) pigs (Fig. 4E).  
201 The unregulated protein expression of IGF2 was also confirmed in the liver and lung  
202 of piglet (1920901) (Fig. 4F). Protein analysis demonstrated that CD163 and MSTN  
203 couldn't be detected in the *CDI63* R312Stop and *MSTN* Q218Stop mutant piglet  
204 (1920901) (Fig. 4F). However, the blood physiology and biochemistry reflected no  
205 significant difference between the 3BE and WT pigs (Table S2, S3).



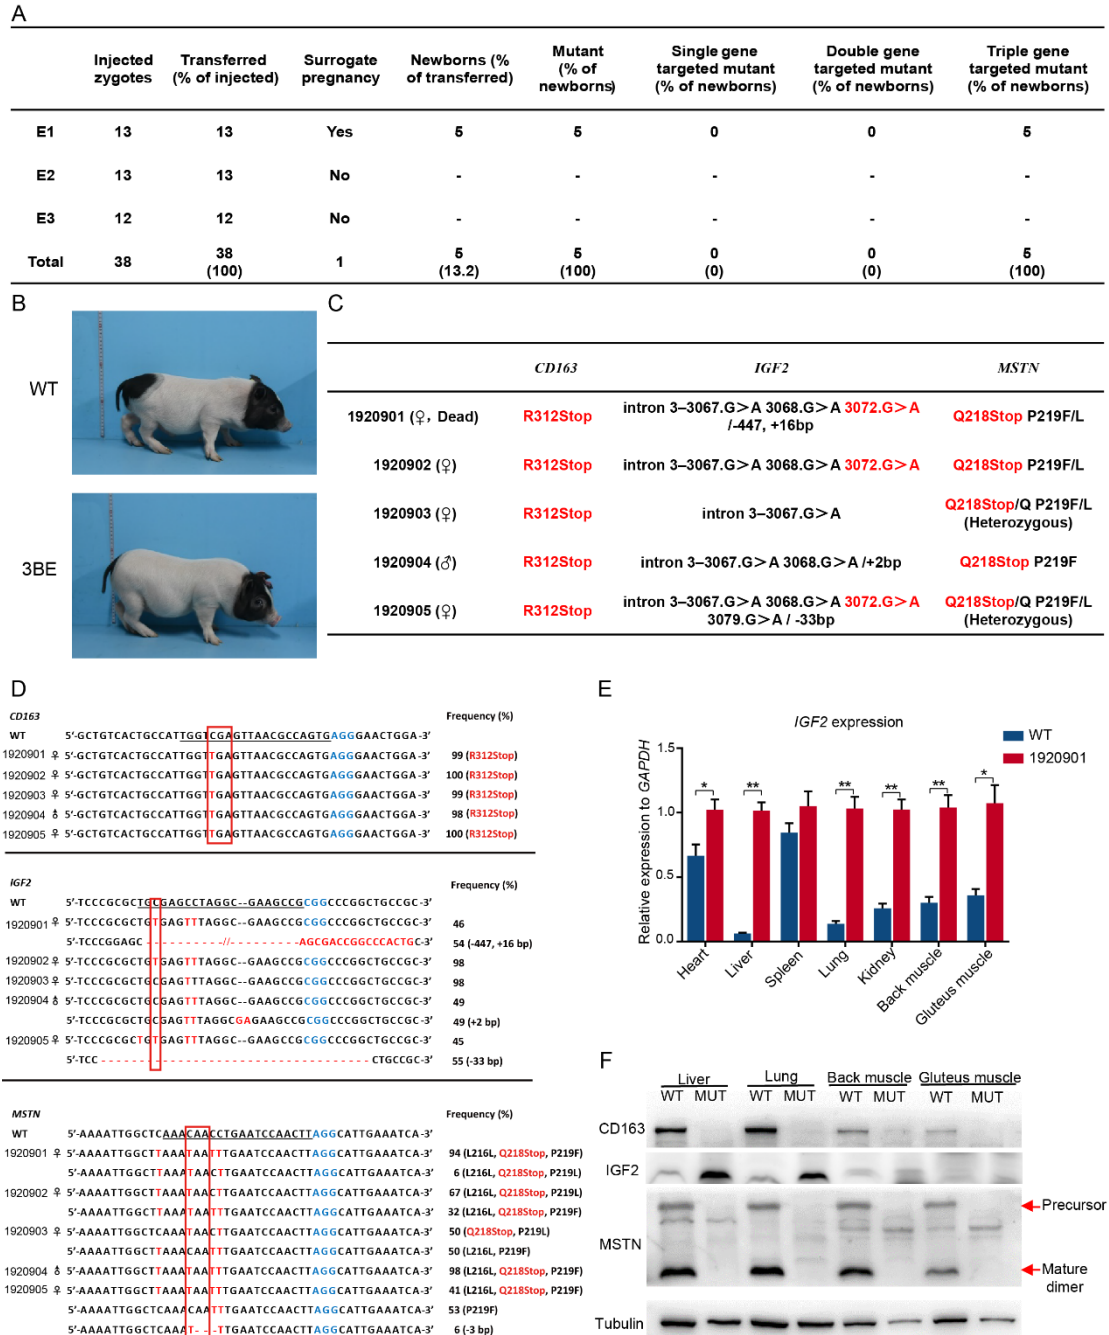

206

207 **Figure 4 Generation *MSTN*, *CDI63* and *IGF2* gene mutations in pigs via zygote injection.** A Summary of  
 208 generation of three genes mutant pigs by using direct zygote injection. B Representative photograph of newborn  
 209 three genes mutant piglets. C The genotype of newborn piglets at *CDI63*, *IGF2* and *MSNT*. D Summary of  
 210 genotypes of newborn piglets from targeted deep sequencing. C-to-T substitutions and indels are shown in red. E  
 211 Western blot was used to detect the expression of *CDI63*, *IGF2* and *MSTN* protein in the liver, lung, back muscle  
 212 and gluteus muscle of WT and 1920901 piglets. F The mRNA expression of *IGF2* in the heart, liver, spleen, lung,  
 213 kidney, back muscle and gluteus muscle of WT and 1920901.

214 **Improved growth performance in 3BE founder pigs**

215 The body weight, body length, body height, hip circumference and chest circumference  
 216 were measured in 3BE female pigs (n=3) and age matched WT female pigs (n=3). The

217 birth weight of 3BE pigs was significantly higher than that of WT pigs ( $0.62\pm 0.019$  vs.  
 218  $0.52\pm 0.043$ ,  $P=0.036$ ) (Supplementary Fig.3 A). Results of growth performance  
 219 showed that the 3BE pigs (0 – 6 months of age) grew faster than age-matched WT pigs  
 220 (Fig.5 A). The hip circumference of 3BE pigs was also higher than that of WT pigs at  
 221 every measuring time (Fig.5 B). The chest circumference, body length and body height  
 222 of 3BE pigs were similar with WT pigs (Fig.5 C; Supplementary Fig.3 B, C). Results  
 223 of average daily feed intake (ADF) (Fig.5 D), average daily gain (ADG) (Fig.5 E) and  
 224 feed conversion ratio (FCR) showed that 3BE pigs (2 – 5 months of age) had lower  
 225 FCRs than age-matched WT pigs (Fig.5 F). The pictures of 3BE pigs are shown in the  
 226 Figure 5 G which indicate a higher hip circumference of 3BE pigs. Histological analysis  
 227 of tissue slices of the gluteus muscle showed increased muscle fiber size in 3BE pigs  
 228 compared with WT pigs (Fig. 5H, I).

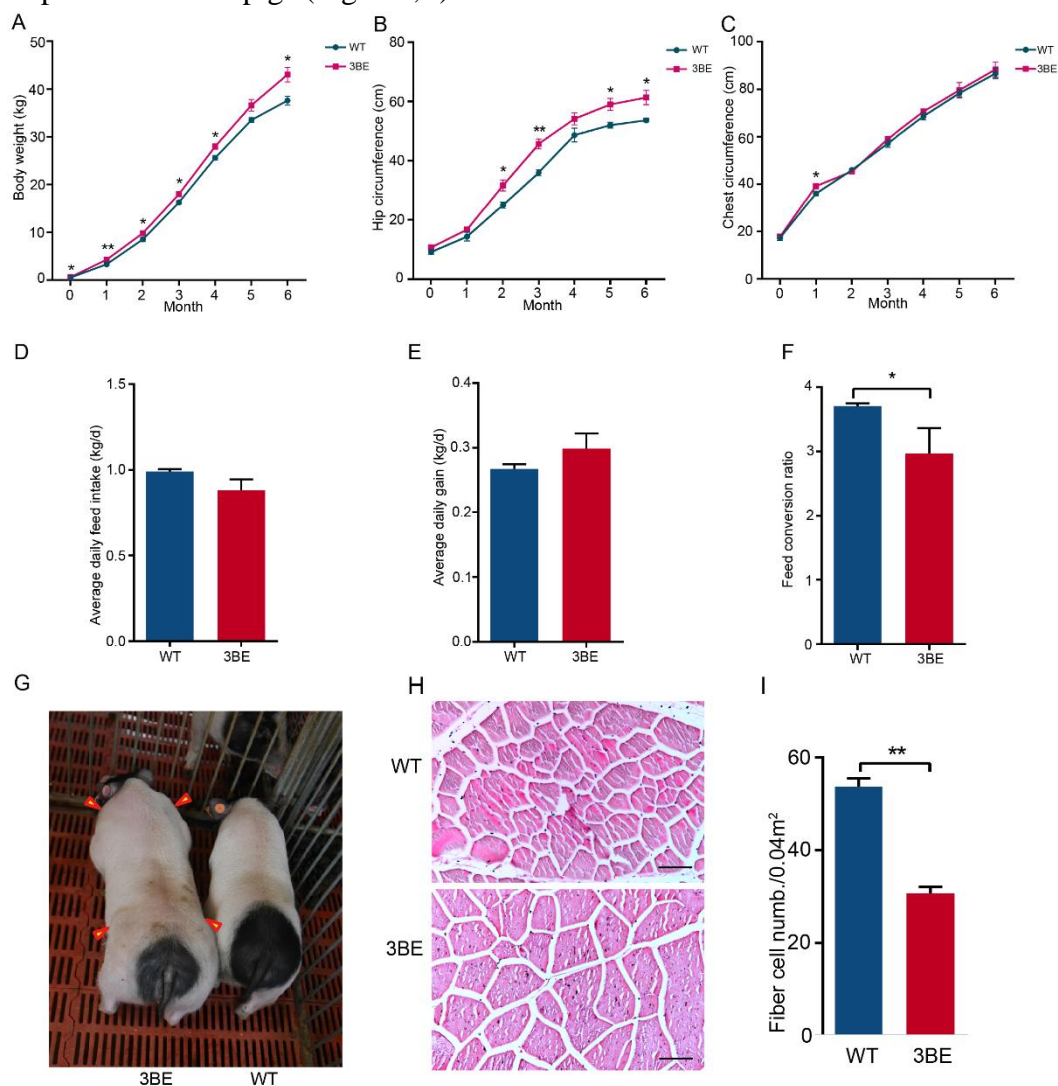

229  
 230 **Figure 5 Growth performance of three genes mutant pigs.** The body weight (A), saddle width (B), chest  
 231 circumference (C), average daily feed intake (D), average daily gain (E) and feed conversion ratio (F) of 3BE pigs  
 232 and age-matched WT (female and male) piglets were measured. **G** Images of 3 month-old female and male of 3BE  
 233 and WT pig. **H, I** HE staining of gluteus muscle in WT and 3BE pigs and the changes of myofiber density in 3BE  
 234 pigs.

## 235 Discussion

236 Developing pig breeds with desirable characteristics such as high growth performance,  
237 meat quality, reproductive success, and disease resistance using traditional breeding  
238 methods is time consuming and cost prohibitive. Developing pigs using gene editing  
239 provides a reliable and rapid solution to improving livestock traits. In this study, a  
240 selective and efficient base editor was successfully used to engineer several beneficial  
241 traits by simultaneously editing multiply gene sites using one-step zygote injection in  
242 pigs.

243 With the continuous innovation and optimization of gene editing, many evolved  
244 versions of CBE tools have been developed to improve editing efficiency and accuracy  
245 (*Cheng et al., 2019; Koblan et al., 2018; Zong et al., 2018*). In this study, we first  
246 compared the editing efficiency of different CBEs at target sites in PEFs. All base  
247 editors were able to generate targeted site mutations, but the editing efficiency of CBEs  
248 varied at different target positions. The CBEs hA3A-BE3 and rA1-BE3 consistently  
249 showed the highest and lowest editing efficiency, respectively. In addition to the  
250 specific conversion of C-to-T mutation, undesired indels were also found at expected  
251 positions in these three genes. However, the efficiency of indel incorporation at the  
252 *IGF2* position was much higher than that of other genes. These results suggest that  
253 hA3A-BE3 may significantly improve the efficiency of base excision repair during C-  
254 to-T conversions in the high GC content regions (*Van Laere et al., 2003*) and  
255 subsequently induce indels in this region. These undesired results were in accordance  
256 with previous studies in human cells, which indicated the products may be dependent  
257 on uracil N-glycosylase (UNG) (*Komor et al., 2017*).

258 Even after the birth of Dolly more than two decades ago, SCNT is still quite inefficient,  
259 making the generation of genetically modified pigs through SCNT a continuous  
260 challenge. Zygote injection of Cas9 or BEs mRNA and sgRNA complexes to target  
261 single point mutation have been reported (*Liang et al., 2017; Liu et al., 2018*), but our  
262 current work is the first to characterize one-step multiple site-specific base editing. In  
263 this work, we found that almost all the injected CBE mRNA complexes have a negative  
264 influence on embryo development competence. This is especially true for hA3A-BE3  
265 injections which may correspond with the high off-target rate of hA3A-BE3 in mRNA  
266 (*Zhou et al., 2019*). The editing efficiency of these CBE members were also variable  
267 depending on the differing targeted genes in embryos. Almost all embryos  
268 (85.2%~100%) showed a single base mutation at the *CDI63* target site, while  
269 33.3%~78.6% embryos showed a mutation at the *MSTN* target site. This variable  
270 editing efficiency may be associated with the different positions of the targeted site in  
271 genes. In addition, we demonstrated that the new CBEs (hA3A-BE3-Y130F and hA3A-  
272 eBE-Y130F) significantly increased targeted mutation efficiency in porcine blastocysts  
273 compared to their predecessor. However, at a cellular level, these new CBEs  
274 unexpectedly induced indels (0~16.7%) and non-C-to-T conversions (0~12.5%) in  
275 blastocysts at a higher frequency than that seen in a previous study (*Komor et al., 2016*).

276 Other studies have also reported similar frequency of indels (6.7–35.6%) in *Psen1*-  
277 targeted mice (Sasaguri *et al.*, 2018), and the different frequency of indels in genes  
278 were also found in the study of *Dmd*-targeted (11.1%) and *Tyr*-targeted (28.6%) mice  
279 (Kim *et al.*, 2017).

280 Most economic traits in pigs are complex, quantitative, and usually controlled by  
281 multiple genes. Because of this complexity, trait improvement requires stacking of  
282 natural and induced mutations; therefore, precision and high-throughput single-base  
283 substitution will be vital for designed breeding. We share our proof-of-concept results  
284 that show CBE-mediated trait improvement in pigs is feasible. Using one-step zygote  
285 injection, we generated 3BE pigs that carried precise mutations in *CDI63*, *IGF2* and  
286 *MSTN*. The hA3A-BE3-Y130F efficiently and precisely targeted C-to-T conversion  
287 with few proximal off-target mutations and negligible negative effects on embryo  
288 development, which is consistent with previous reports in mammalian cells (Gehrke *et*  
289 *al.*, 2018; St Martin *et al.*, 2018).

290 Our approach can help livestock breeders bypass time constraints with improving  
291 economic traits in pigs. Our approach can be used to directly create desirable mutations  
292 in a natural or genetically modified background using one-step zygote injection. To the  
293 best of our knowledge, this is the first report highlighting the highly efficient base  
294 conversion of three economic trait-related genes in pigs using a one step process. These  
295 findings indicate an achievable and rapid genetic improvement for multiple economic  
296 traits that conventional breeding and selection strategy could not accomplish. Beyond  
297 enhancing beneficial trait variation in pigs, our approach opens a new chapter in gene  
298 pyramid breeding for livestock.

## 299 **Materials and Methods**

### 300 **Animals**

301 Bama miniature pigs were maintained at the Beijing Farm Animal Research Center,  
302 Institute of Zoology, Chinese Academy of Sciences. All pig studies were conducted  
303 according to experimental practices and standards approved by the Institutional Animal  
304 Care and Use Committee of the Institute of Zoology, Chinese Academy of Sciences.

### 305 **Vector construction**

306 *MSTN*-sgRNA, *CDI63*-sgRNA and *IGF2*-sgRNA were designed following the NGG  
307 rule. Two complementary oligonucleotides of sgRNAs were synthesized and then  
308 annealed to double-stranded DNAs. The annealed products were then cloned into the  
309 BsaI-digested pGL3-U6-sgRNA expression vectors. sgRNA-oligo sequences used  
310 above are listed in Supplementary Table 1.

### 311 **mRNA and sgRNA preparation**

312 rA1-BE3, hA3A-BE3, hA3A-BE3-Y130F and hA3A-eBE3-Y130F plasmids were  
313 obtained from Addgene. The plasmid was linearized with Not I, and mRNA was  
314 synthesized using an in vitro RNA transcription kit (mMESSAGE mMACHINE™ T7  
315 ULTRA Transcription Kit, AM1345, Invitrogen). sgRNAs were amplified and  
316 transcribed in vitro using the MEGAShortsript™ T7 Transcription Kit (AM1354,

317 Invitrogen) according to manufacturer's instructions. sgRNA primer sequences are  
318 listed in Supplementary Table 1.

### 319 **PEFs culture and transfection**

320 Pig fetal fibroblasts (PFFs) were isolated from 35-day-old fetuses of Bama pigs. A day  
321 before transfection, PFFs were thawed and cultured in PFFs culture medium  
322 (Dulbecco's modified Eagle's medium [DMEM, HyClone]) and supplemented with 15%  
323 fetal bovine serum (FBS, HyClone), 1% nonessential amino acids (NEAA, Gibco), and  
324 2 mM GlutaMAX (Gibco). Next,  $\sim 1 \times 10^6$  PFFs were electroporated with rA1-BE3,  
325 hA3A-BE3, hA3A-BE3-Y130F or hA3A-eBE-Y130F (4  $\mu$ g), and sgRNA-expressing  
326 vectors (2  $\mu$ g of each sgRNA). The electroporated cells were recovered for 48 h, split  
327 into single cells and cultured in 96-well plates for 8 days to form colonies by flow  
328 cytometry. We also collected 10,000 single GFP positive cells to detect the efficiency  
329 of different base editor systems. Cell lysates were then used as templates for PCR. Next,  
330 PCR products were used for sub-cloning into the pMD18-T vector (Takara) and  
331 sequenced to determine mutation efficiency. Cell colonies with target mutations were  
332 identified using PCR and then sequenced. Primer sequences are listed in Supplementary  
333 table 1.

### 334 **Microinjection of pig embryo and zygotes**

335 Porcine ovaries were obtained from a local slaughterhouse, and porcine oocyte  
336 collection, in vitro maturation, parthenogenetic activation (PA) and the reagent  
337 formulation were conducted as described in our previous studies (*Wang et al., 2015*).  
338 Zygotes from Bama miniature pigs were collected within 24 h after insemination and  
339 transferred into manipulation medium (0.75 g HEPES, 9.5 g TCM-199 powder, 0.05 g  
340 NaHCO<sub>3</sub>, 1.755 g NaCl, 0.05 g penicillin, 0.06 g streptomycin, and 3.0 g BSA, in a  
341 final volume of 1L in Milli-Q water, pH 7.2–7.4). The protocol for microinjection of  
342 oocytes and pronuclear stage embryos has been described in detail in our published  
343 protocols (*Wang et al., 2015*). Briefly, a mixture of rA1-BE3, hA3A-BE3, hA3A-BE3-  
344 Y130F and hA3A-eBE3-Y130F mRNA (200 ng/ul), and sgRNA (50 ng/ul) was co-  
345 injected into the cytoplasm of porcine PA embryos and pronuclear-stage zygotes. The  
346 injected embryos or zygotes were then cultured in PZM3medium, pH 7.4,  
347 supplemented with 3 mg/ml BSA, for 7 days or transferred to surrogate pigs.

### 348 **Single embryo PCR amplification and pig genotyping**

349 Injected embryos were collected at the blastocyst stage. Genomic DNA was extracted  
350 with lysis buffer (1% NP40) at 55 °C for 40 min and 95 °C for 15 min, and then were  
351 used as a template for PCR, and subjected to Sanger sequencing. Genomic DNA of  
352 newborn pigs was extracted from ear clips for PCR and subjected to Sanger sequencing  
353 and targeted deep sequencing. All primers for detection are listed in Supplementary  
354 Table 1.

### 355 **Targeted deep sequencing**

356 Target sites were amplified from genomic DNA using i5 Phusion polymerase. The  
357 paired-end sequencing of PCR amplicons was performed by Sangon Biotech  
358 (Shanghai), using an Illumina MiSeq. The primers are listed in supplementary Table 1.

### 359 **Quantitative real-time PCR**

360 Total RNA was extracted from porcine heart, liver, spleen, lung, kidney, back muscle  
361 and gluteus muscle tissues with TRIzol (Invitrogen). Total RNAs were used for reverse  
362 transcription using a FastQuant RT Kit (Tiangen Biotech). qPCR reactions were  
363 performed using TaKaRa SYBR Premix Ex Taq (TaKaRa, Tokyo, Japan) with an  
364 Agilent Mx3005p (Agilent Technologies) quantitative PCR instrument. The  
365 housekeeping gene, *GAPDH*, was used as an internal control. Relative expression of  
366 *IGF2* was calculated using the comparative cycle threshold ( $2^{-\Delta\Delta C_t}$ ) method. All primer  
367 sequences are shown in Supplementary Table 1.

### 368 **Western blot analysis**

369 Liver, lung, back muscle and gluteus muscle tissues were dissected and frozen  
370 immediately in liquid nitrogen and stored at  $-80^{\circ}\text{C}$  until use. Total protein was extracted  
371 using the Minute Total Protein Extraction Kit (Invent Biotechnologies, Inc.). Proteins  
372 were loaded to SDS-PAGE and transferred onto PVDF membranes. Membranes were  
373 blocked with 5% fat-free milk for 1 h at room temperature. Primary antibodies, anti-  
374 CD163 (ab87099, 1:500; Abcam), anti-IGF2 (ab170304, 1:100; Abcam) anti-MSTN  
375 (ab98337, 1:100; Abcam), and anti-Tubulin (SC9104, 1:3,000; Santa Cruz) were  
376 incubated with the membranes overnight at  $4^{\circ}\text{C}$ . Next, membranes were incubated with  
377 HRP-conjugated secondary antibodies for 1h at room temperature. All signals were  
378 detected using ECL Prime chemiluminescence (GE Healthcare) according to the  
379 manufacturer's protocols.

### 380 **Off-target assay**

381 Ten potential off-target sites (POTs) for each sgRNA were predicted for site-specific  
382 edits by a base-editor system, according to an online design tool CAS-OFFinder  
383 (<http://www.rgenome.net/cas-offinder/>)(*Bae et al., 2014*). All POTs were amplified by  
384 PCR and then subjected to sequencing. All primers for amplifying the off-target sites  
385 are listed in Supplementary table S1.

### 386 **Histochemistry**

387 Three tissue samples ( $0.5\text{ cm} \times 0.5\text{ cm} \times 0.5\text{ cm}$ ) were randomly chosen from the  
388 gluteus muscles of 3BE pigs at 6 months of age. The tissues were fixed in 4%  
389 paraformaldehyde for 24 h and then moved into 70% alcohol. Samples were embedded  
390 in wax blocks, sectioned at  $5\mu\text{m}$ , and then stained with hematoxylin and eosin (H&E).  
391 Five different microscopic fields were randomly chosen, and muscle fiber density was  
392 defined as the number of myofibers per  $0.04\text{ mm}^2$  of the muscle cross-sectional area.

### 393 **Blood analysis**

394 Venous blood samples were collected to determine blood physiology and biochemistry.  
395 Samples were tested in the Beijing Lawke Health Laboratory.

### 396 **Statistical analysis**

397 Statistical data are expressed as mean  $\pm$  SEM and at least three individual  
398 representations were included in all experiments. Statistical significance was analyzed  
399 with a Student's t test (unpaired) or two-way ANOVA using GraphPad prism software  
400 6.0. A p-value  $< 0.05$  was considered statistically significant. \*\*,  $P < 0.01$ ; \*,  $P < 0.05$ .

## 401 **Acknowledgement**

402 This work was supported by the National Natural Science Foundation for distinguished  
403 Young Scholars (31672387), National Key Research and Development Program of  
404 China (2020YFC1316602) ; National Natural Science Foundation of China (81671274,  
405 31925036, 31272440, and 31801031), the National Transgenic Project of China  
406 (2016ZX08009003-006-007), and the Elite Youth Program of the Chinese Academy of  
407 Agricultural Sciences (ASTIP-IAS05).

## 408 **Author contributions**

409 Jianguo Zhao and Yanfang Wang conceived the study. Ruigao Song, Yu Wang and  
410 Qiantao Zheng designed and performed the experiments and analyzed the data. Ruigao  
411 Song, Yu Wang performed molecular experiments. Ruigao Song performed embryo  
412 microinjection and embryos transfer experiments. Cunwei Cao analyzed the off-target  
413 date. Ruigao Song wrote the manuscript. Yanfang Wang and Jianguo Zhao supervised  
414 the project and revised the paper. All authors read and approved the final manuscript.

## 415 **Conflict of interest**

416 The authors declare that they have no conflict of interest.

## 417 **Reference**

- 418 Bae S, Park J and Kim JS. 2014. Cas-OFFinder: a fast and versatile algorithm  
419 that searches for potential off-target sites of Cas9 RNA-guided endonucleases.  
420 *Bioinformatics* **30**:1473-1475. doi: 10.1093/bioinformatics/btu048
- 421 Burkard C, Opriessnig T, Mileham AJ, Stadejek T, Ait-Ali T, Lillico SG,  
422 Whitelaw CBA and Archibald AL. 2018. Pigs Lacking the Scavenger Receptor  
423 Cysteine-Rich Domain 5 of CD163 Are Resistant to Porcine Reproductive and  
424 Respiratory Syndrome Virus 1 Infection. *Journal of Virology* **92**:doi:  
425 10.1128/JVI.00415-18
- 426 Cheng TL, Li S, Yuan B, Wang X, Zhou W and Qiu Z. 2019. Expanding C-T  
427 base editing toolkit with diversified cytidine deaminases. *Nat Commun* **10**:3612.  
428 doi: 10.1038/s41467-019-11562-6
- 429 Contreras-Soto RI, Mora F, de Oliveira MAR, Higashi W, Scapim CA and  
430 Schuster I. 2017. A Genome-Wide Association Study for Agronomic Traits in  
431 Soybean Using SNP Markers and SNP-Based Haplotype Analysis. *PloS One*  
432 **12**:doi: 10.1371/journal.pone.0171105
- 433 Gehrke JM, Cervantes O, Clement MK, Wu Y, Zeng J, Bauer DE, Pinello L and  
434 Joung JK. 2018. An APOBEC3A-Cas9 base editor with minimized bystander  
435 and off-target activities. *Nature Biotechnology* **36**:977-982. doi:  
436 10.1038/nbt.4199
- 437 Hess AS, Islam Z, Hess MK, Rowland RRR, Lunney JK, Doeschl-Wilson A,  
438 Plastow GS and Dekkers JCM. 2016. Comparison of host genetic factors

439 influencing pig response to infection with two North American isolates of  
440 porcine reproductive and respiratory syndrome virus. *Genetics Selection*  
441 *Evolution* **48**:43. doi: 10.1186/s12711-016-0222-0  
442 Huang XJ, Zhang HX, Wang HL, Xiong K, Qin L and Liu HL. 2014. Disruption  
443 of the Myostatin Gene in Porcine Primary Fibroblasts and Embryos Using Zinc-  
444 Finger Nucleases. *Molecules and Cells* **37**:302-306. doi:  
445 10.14348/molcells.2014.2209  
446 Kim K, Ryu SM, Kim ST, Baek G, Kim D, Lim K, Chung E, Kim S and Kim  
447 JS. 2017. Highly efficient RNA-guided base editing in mouse embryos. *Nature*  
448 *Biotechnology* **35**:435-437. doi: 10.1038/nbt.3816  
449 Koblan LW, Doman JL, Wilson C, Levy JM, Tay T, Newby GA, Maianti JP,  
450 Raguram A and Liu DR. 2018. Improving cytidine and adenine base editors by  
451 expression optimization and ancestral reconstruction. *Nature Biotechnology*  
452 **36**:843-846. doi: 10.1038/nbt.4172  
453 Komor AC, Kim YB, Packer MS, Zuris JA and Liu DR. 2016. Programmable  
454 editing of a target base in genomic DNA without double-stranded DNA cleavage.  
455 *Nature* **533**:420-424. doi: 10.1038/nature17946  
456 Komor AC, Zhao KT, Packer MS, Gaudelli NM, Waterbury AL, Koblan LW,  
457 Kim YB, Badran AH and Liu DR. 2017. Improved base excision repair  
458 inhibition and bacteriophage Mu Gam protein yields C:G-to-T:A base editors  
459 with higher efficiency and product purity. *Sci Adv* **3**:eaao4774. doi:  
460 10.1126/sciadv.aao4774  
461 Lee KT, Lee YM, Alam M, Choi BH, Park MR, Kim KS, Kim TH and Kim JJ.  
462 2012. A Whole Genome Association Study on Meat Quality Traits Using High  
463 Density SNP Chips in a Cross between Korean Native Pig and Landrace. *Asian-*  
464 *Australasian Journal of Animal Sciences* **25**:1529-1539. doi:  
465 10.5713/ajas.2012.12474  
466 Liang PP, Sun HW, Ying S, Zhang XY, Xie XW, Zhang JR, Zhen Z, Chen YX,  
467 Ding CH, Xiong YY, Ma WB, Dan L, Huang JJ and Zhou SY. 2017. Effective  
468 gene editing by high-fidelity base editor 2 in mouse zygotes. *Protein & Cell*  
469 **8**:601-611. doi: 10.1007/s13238-017-0418-2  
470 Liu ZQ, Chen M, Chen SY, Deng JC, Song YN, Lai LX and Li ZJ. 2018. Highly  
471 efficient RNA-guided base editing in rabbit. *Nature Communications* **9**:doi:  
472 10.1038/s41467-018-05232-2  
473 Ma X, Li PH, Zhu MX, He LC, Sui SP, Gao S, Su GS, Ding NS, Huang Y, Lu  
474 ZQ, Huang XG and Huang RH. 2018. Genome-wide association analysis  
475 reveals genomic regions on Chromosome 13 affecting litter size and candidate  
476 genes for uterine horn length in Erhualian pigs. *Animal* **12**:2453-2461. doi:  
477 10.1017/S1751731118000332  
478 Mora F, Quiral YA, Matus I, Russell J, Waugh R and Del Pozo A. 2016. SNP-  
479 Based QTL Mapping of 15 Complex Traits in Barley under Rain-Fed and Well-  
480 Watered Conditions by a Mixed Modeling Approach. *Frontiers of Plant Science*



481 7:909. doi: 10.3389/fpls.2016.00909  
482 Sasaguri H, Nagata K, Sekiguchi M, Fujioka R, Matsuba Y, Hashimoto S, Sato  
483 K, Kurup D, Yokota T and Saido TC. 2018. Introduction of pathogenic  
484 mutations into the mouse *Psen1* gene by Base Editor and Target-AID. *Nature*  
485 *Communications* **9**:doi: 10.1038/s41467-018-05262-w  
486 St Martin A, Salamango D, Serebrenik A, Shaban N, Brown WL, Donati F,  
487 Munagala U, Conticello SG and Harris RS. 2018. A fluorescent reporter for  
488 quantification and enrichment of DNA editing by APOBEC-Cas9 or cleavage  
489 by Cas9 in living cells. *Nucleic Acids Research* **46**:e84. doi:  
490 10.1093/nar/gky332  
491 Tanihara F, Hirata M, Nguyen NT, Le QA, Wittayarat M, Fahrudin M, Hirano  
492 T and Otoi T. 2019. Generation of CD163-edited pig via electroporation of the  
493 CRISPR/Cas9 system into porcine in vitro-fertilized zygotes. *Animal*  
494 *Biotechnology* 1-8. doi: 10.1080/10495398.2019.1668801  
495 Van Laere AS, Nguyen M, Braunschweig M, Nezer C, Collette C, Moreau L,  
496 Archibald AL, Haley CS, Buys N, Tally M, Andersson G, Georges M and  
497 Andersson L. 2003. A regulatory mutation in *IGF2* causes a major QTL effect  
498 on muscle growth in the pig. *Nature* **425**:832-836. doi: 10.1038/nature02064  
499 Wang K, Tang X, Xie Z, Zou X, Li M, Yuan H, Guo N, Ouyang H, Jiao H and  
500 Pang D. 2017. CRISPR/Cas9-mediated knockout of myostatin in Chinese  
501 indigenous Erhualian pigs. *Transgenic Research* **26**:799-805. doi:  
502 10.1007/s11248-017-0044-z  
503 Wang X, Zhou J, Cao C, Huang J, Hai T, Wang Y, Zheng Q, Zhang H, Qin G,  
504 Miao X, Wang H, Cao S, Zhou Q and Zhao J. 2015. Efficient CRISPR/Cas9-  
505 mediated biallelic gene disruption and site-specific knockin after rapid selection  
506 of highly active sgRNAs in pigs. *Scientific Reports* **5**:13348. doi:  
507 10.1038/srep13348  
508 Whitworth KM, Lee K, Benne JA, Beaton BP, Spate LD, Murphy SL, Samuel  
509 MS, Mao J, O'Gorman C, Walters EM, Murphy CN, Driver J, Mileham A,  
510 McLaren D, Wells KD and Prather RS. 2014. Use of the CRISPR/Cas9 system  
511 to produce genetically engineered pigs from in vitro-derived oocytes and  
512 embryos. *Biology of Reproduction* **91**:78. doi: 10.1095/biolreprod.114.121723  
513 Whitworth KM, Rowland RR, Ewen CL, Tribble BR, Kerrigan MA, Cino-Ozuna  
514 AG, Samuel MS, Lightner JE, McLaren DG, Mileham AJ, Wells KD and  
515 Prather RS. 2016. Gene-edited pigs are protected from porcine reproductive and  
516 respiratory syndrome virus. *Nat Biotechnol* **34**:20-22. doi: 10.1038/nbt.3434  
517 Xiang G, Ren J, Hai T, Fu R, Yu D, Wang J, Li W, Wang H and Zhou Q. 2018.  
518 Editing porcine *IGF2* regulatory element improved meat production in Chinese  
519 Bama pigs. *Cellular and Molecular Life Sciences* **75**:4619-4628. doi:  
520 10.1007/s00018-018-2917-6  
521 Xie J, Ge W, Li N, Liu Q, Chen F, Yang X, Huang X, Ouyang Z, Zhang Q, Zhao  
522 Y, Liu Z, Gou S, Wu H, Lai C, Fan N, Jin Q, Shi H, Liang Y, Lan T, Quan L, Li

523 X, Wang K and Lai L. 2019. Efficient base editing for multiple genes and loci  
524 in pigs using base editors. *Nat Commun* **10**:2852. doi: 10.1038/s41467-019-  
525 10421-8

526 Xie JK, Ge WK, Li N, Liu QS, Chen FB, Yang XY, Huang XY, Ouyang Z,  
527 Zhang QJ, Zhao Y, Liu ZM, Gou SX, Wu H, Lai CD, Fan NN, Jin Q, Shi H,  
528 Liang YH, Lan T, Quan LQ, Li XP, Wang KP and Lai LX. 2019. Efficient base  
529 editing for multiple genes and loci in pigs using base editors. *Nature*  
530 *Communications* **10**:doi: 10.1038/s41467-019-10421-8

531 Yang D, Yang H, Li W, Zhao B, Ouyang Z, Liu Z, Zhao Y, Fan N, Song J, Tian  
532 J, Li F, Zhang J, Chang L, Pei D, Chen YE and Lai L. 2011. Generation of  
533 PPARgamma mono-allelic knockout pigs via zinc-finger nucleases and nuclear  
534 transfer cloning. *Cell Research* **21**:979-982. doi: 10.1038/cr.2011.70

535 Yue C, Bai WL, Zheng YY, Hui TY, Sun JM, Guo D, Guo SL and Wang ZY.  
536 2019. Correlation analysis of candidate gene SNP for high-yield in Liaoning  
537 cashmere goats with litter size and cashmere performance. *Animal*  
538 *Biotechnology* doi: 10.1080/10495398.2019.1652188

539 Zhang J, Liu J, Yang W, Cui M, Dai B, Dong Y, Yang J, Zhang X, Liu D, Liang  
540 H and Cang M. 2019. Comparison of gene editing efficiencies of CRISPR/Cas9  
541 and TALEN for generation of MSTN knock-out cashmere goats.  
542 *Theriogenology* **132**:1-11. doi: 10.1016/j.theriogenology.2019.03.029

543 Zhou C, Sun Y, Yan R, Liu Y, Zuo E, Gu C, Han L, Wei Y, Hu X, Zeng R, Li Y,  
544 Zhou H, Guo F and Yang H. 2019. Off-target RNA mutation induced by DNA  
545 base editing and its elimination by mutagenesis. *Nature* **571**:275-278. doi:  
546 10.1038/s41586-019-1314-0

547 Zong Y, Song Q, Li C, Jin S, Zhang D, Wang Y, Qiu JL and Gao C. 2018.  
548 Efficient C-to-T base editing in plants using a fusion of nCas9 and human  
549 APOBEC3A. *Nature Biotechnology* doi: 10.1038/nbt.4261

550
